# Supplementary material for: Identification of new drug treatments to combat COVID19: A signature-based approach using iLINCS
Source: PubMed Central journal article supplement (PMC7336712; doi:10.21203/rs.3.rs-25643/v1), 2020-04-30
Supplement: Supplementalmaterial.pdf [file Supplementalmaterial.pdf]

## **Supplementary Information**

### **Identification of new drug treatments to combat COVID19: A signature-based approach using iLINCS**

Sinead M O'Donovan, Hunter Eby, Nicholas D Henkel, Justin Creeden, Ali Imami, Sophie Asah, Xiaolu Zhang, Xiaojun Wu, Rawan Alnafisah, R. Travis Taylor, James Reigle, Alexander Thorman, Behrouz Shamsaei, Jarek Meller, Robert E McCullumsmith

## Supplemental Figure Legends

**Figure S1. Tanimoto coefficient correlogram.** Heat map showing the Tanimoto coefficients of the 9 drugs with antiviral indications that comprise drug groupings 1-5 (x-axis) and the 14 candidate repurposable drugs identified in this study (y-axis). The Tanimoto coefficient, which represents the degree of structural similarity between two compounds, was computed using binary chemical fingerprints for each of the drugs. Coefficients range from 0 (no structural similarity) to 1 (exact structural similarity). In this analysis, Tanimoto coefficients ranged from 0.1 - 0.59, suggesting low to moderate structural similarity between antiviral treatments currently in use for treating coronavirus family pathogens and the identified candidate drugs.

**Figure S2. Heat map of disease signatures.** Unsupervised clustering of Library of Integrated Network-Based Cellular Signature (LINCS) L1000 genes, extracted from RNAseq datasets of severe acute respiratory syndrome (SARS) and Middle East respiratory syndrome-related coronavirus (MERS) (GSE56192). L1000 genes were also extracted from an Influenza A (INFL) microarray dataset (GSE47963) as a non-coronavirus pathogen comparison group. This heat map shows clustering of coronavirus pathogens SARS and MERS in contrast to INFL.

**Figure S3. Heat map of drug groupings 1-5 (MCF7 cell line).** Unsupervised clustering of Library of Integrated Network-Based Cellular Signature (LINCS) L1000 genes, extracted from RNAseq datasets of severe acute respiratory syndrome (SARS) and Middle East respiratory syndrome-related coronavirus (MERS) (GSE56192). L1000 genes were also extracted from an Influenza A (INFL) microarray dataset (GSE47963) as a non-coronavirus pathogen comparison group. L1000 genes were also extracted from five drug groupings (drug clusters 1-5) which represent drugs currently in use to treat coronavirus pathogens. Drug clusters signatures were extracted from the MCF7 cell line. Drugs are clustered based on mechanism of action, ATC

classification and/or structural similarity. Furosemide (FUR), a drug which is not utilized in the treatment of viral pathogens, was utilized as a comparison group. Drug group signatures were calculated by taking the average logFoldChange of each of the drugs within the cluster to represent the gene expression. This heat map provides an overview of the difference in patterns of gene expression between drug target groupings and disease in the MCF7 cell line, demonstrating discordance between drugs used as antivirals and disease signatures. Drug cluster 1: chloroquine and hydroxychloroquine, Drug cluster 2: Lopinavir and Ritonavir, Drug cluster 3: Fedratinib, Ruxolinitib, and Baricitinib. Drug cluster 4: azithromycin, and Drug cluster 5: Losartan.

**Figure S4. Heat map of drug target groupings 1-5 (HA1E cell line).** Unsupervised clustering of Library of Integrated Network-Based Cellular Signature (LINCS) L1000 genes, extracted from RNAseq datasets of severe acute respiratory syndrome (SARS) and Middle East respiratory syndrome-related coronavirus (MERS) (GSE56192). L1000 genes were also extracted from an Influenza A (INFL) microarray dataset (GSE47963) as a non-coronavirus pathogen comparison group. L1000 genes were also extracted from five drug groupings (drug clusters 1-5) which represent drugs currently in use to treat coronavirus pathogens. Drug clusters signatures were extracted from the HA1E cell line. Drugs are clustered based on mechanism of action, ATC classification and/or structural similarity. Furosemide (FUR), a drug which is not utilized in the treatment of viral pathogens, was utilized as a comparison group. Drug group signatures were calculated by taking the average logFoldChange of each of the drugs within the cluster to represent the gene expression. This heat map provides an overview of the difference in patterns of gene expression between drug target groupings and disease in the HA1E cell line, demonstrating discordance between drugs used as antivirals and disease signatures. Drug cluster 1: chloroquine and hydroxychloroquine, Drug cluster 2: Lopinavir and Ritonavir, Drug

cluster 3: Fedratinib, Ruxolinitib, and Baricitinib. Drug cluster 4: azithromycin, and Drug cluster 5: Losartan.

**Figure S5. Biological Pathway analysis of disease and drug target grouping signatures from MCF7 cell line.** Gene lists for drug target groupings 1-5 consisting of L1000 genes at LFC +/- 0.85 were searched in Reactome. Pathways for drug groupings 1 - 3 were determined by p-value < 0.05, and “Entities Found” ≥ 10, and groupings 4 and 5 were determined by p-value < 0.05, and “Entities Found” ≥ 3. Gene lists for disease signatures consisting of L1000 genes at LFC ≥ 0.5 and ≤ -0.5 were searched in Reactome. Pathways were determined by p-value < 0.05, and “Entities Found” ≥ 6. Drug cluster 1: chloroquine and hydroxychloroquine, Drug cluster 2: Lopinavir and Ritonavir, Drug cluster 3: Fedratinib, Ruxolinitib, and Baricitinib. Drug cluster 4: azithromycin, and Drug cluster 5: Losartan.

**Figure S6. Biological Pathway analysis of disease and drug target grouping signatures from HA1E cell line.** Gene lists for drug target groupings 1-5 consisting of L1000 genes at LFC +/- 0.85 were searched in Reactome. Pathways for drug groupings 1 - 3 were determined by p-value < 0.05, and “Entities Found” ≥ 10, and groupings 4 and 5 were determined by p-value < 0.05, and “Entities Found” ≥ 3. Gene lists for disease signatures consisting of L1000 genes at LFC ≥ 0.5 and ≤ -0.5 were searched in Reactome. Pathways were determined by p-value < 0.05, and “Entities Found” ≥ 6. Drug cluster 1: chloroquine and hydroxychloroquine, Drug cluster 2: Lopinavir and Ritonavir, Drug cluster 3: Fedratinib, Ruxolinitib, and Baricitinib. Drug cluster 4: azithromycin, and Drug cluster 5: Losartan.

**Figure S7. Heat map of 14 candidate drugs (MCF7 cell line).** Unsupervised clustering of Library of Integrated Network-Based Cellular Signature (LINCS) L1000 genes, extracted from RNAseq datasets of severe acute respiratory syndrome (SARS) and Middle East respiratory

syndrome-related coronavirus (MERS) (GSE56192). L1000 genes were also extracted from an Influenza A (INFL) microarray dataset (GSE47963) as a non-coronavirus pathogen comparison group. L1000 gene signatures for the fourteen candidate drugs were generated from MCF7 cell line. Furosemide (FUR), a drug which is not utilized in the treatment of viral pathogens, was utilized as a comparison group. A heat map was constructed using the logFoldChange from LINCS. This heat map provides an overview of the difference in patterns of gene expression between the candidate drugs and disease in the MCF7 cell line, demonstrating discordance between these putative repurposable drugs and coronavirus disease signatures. AC1MJ3VH (AC1), AT-9283 (AT), Alvocidib (ALV), BRD-K54343811 (BRD), Broad-Sai (BRO), CHEMBL2136735 (CHE), COT-10B (COT), Genistein (GEN), GSK-1059615 (GSK), GSK3 Inhibitor-IX (GIX), Idebenone (IDB), Idelalisib (IDL), Ivermectin (IVE), Pencillin V (PEN).

**Figure S8. Heat map of top 8 candidate drugs (MCF7 cell line).** Unsupervised clustering of Library of Integrated Network-Based Cellular Signature (LINCS) L1000 genes, extracted from RNAseq datasets of severe acute respiratory syndrome (SARS) and Middle East respiratory syndrome-related coronavirus (MERS) (GSE56192). L1000 genes were also extracted from an Influenza A (INFL) microarray dataset (GSE47963) as a non-coronavirus pathogen comparison group. L1000 gene signatures for the 8 candidate drugs that are currently approved for use in humans were generated from MCF7 cell line. Furosemide (FUR), a drug which is not utilized in the treatment of viral pathogens, was utilized as a comparison group. A heat map was constructed using the logFoldChange from LINCS. This heat map provides an overview of the difference in patterns of gene expression between the candidate drugs and disease in the MCF7 cell line, demonstrating discordance between these putative repurposable drugs and coronavirus disease signatures. AT-9283 (AT), Alvocidib (ALV), Genistein (GEN), GSK-1059615 (GSK), Idebenone (IDB), Idelalisib (IDL), Ivermectin (IVE), Pencillin V (PEN)

**Figure S9. Heat map of 14 candidate drugs (HA1E cell line).** Unsupervised clustering of Library of Integrated Network-Based Cellular Signature (LINCS) L1000 genes, extracted from RNAseq datasets of severe acute respiratory syndrome (SARS) and Middle East respiratory syndrome-related coronavirus (MERS) (GSE56192). L1000 genes were also extracted from an Influenza A (INFL) microarray dataset (GSE47963) as a non-coronavirus pathogen comparison group. L1000 gene signatures for the fourteen candidate drugs were generated from HA1E cell line. Furosemide (FUR), a drug which is not utilized in the treatment of viral pathogens, was utilized as a comparison group. A heat map was constructed using the logFoldChange from LINCS. This heat map provides an overview of the difference in patterns of gene expression between the candidate drugs and disease in the HA1E cell line, demonstrating discordance between these putative repurposable drugs and coronavirus disease signatures. AC1MJ3VH (AC1), AT-9283 (AT), Alvocidib (ALV), BRD-K54343811 (BRD), Broad-Sai (BRO), CHEMBL2136735 (CHE), COT-10B (COT), Genistein (GEN), GSK-1059615 (GSK), GSK3 Inhibitor-IX (GIX), Idebenone (IDB), Idelalisib (IDL), Ivermectin (IVE), Pencillin V (PEN).

**Figure S10. Heat map of top 8 candidate drugs (HA1E cell line).** Unsupervised clustering of Library of Integrated Network-Based Cellular Signature (LINCS) L1000 genes, extracted from RNAseq datasets of severe acute respiratory syndrome (SARS) and Middle East respiratory syndrome-related coronavirus (MERS) (GSE56192). L1000 genes were also extracted from an Influenza A (INFL) microarray dataset (GSE47963) as a non-coronavirus pathogen comparison group. L1000 gene signatures for the 8 candidate drugs that are currently approved for use in humans were generated from HA1E cell line. Furosemide (FUR), a drug which is not utilized in the treatment of viral pathogens, was utilized as a comparison group. A heat map was constructed using the logFoldChange from LINCS. This heat map provides an overview of the difference in patterns of gene expression between the candidate drugs and disease in the HA1E

cell line, demonstrating discordance between these putative repurposable drugs and coronavirus disease signatures. AT-9283 (AT), Alvocidib (ALV), Genistein (GEN), GSK-1059615 (GSK), Idebenone (IDB), Idelalisib (IDL), Ivermectin (IVE), Pencillin V (PEN).

**Figure S11. Biological Pathway analysis of disease and candidate repurposable drug signatures from MCF7 cell line.** Gene lists for candidate drugs consisting of L1000 genes at LFC +/- 0.85 were searched in Reactome. Pathways were determined by p-value < 0.05, and “Entities Found” ≥ 30. Gene lists for disease signatures consisting of L1000 genes at LFC ≥ 0.5 and ≤ -0.5 were searched in Reactome. Pathways were determined by p-value < 0.05, and “Entities Found” ≥ 6. AC1MJ3VH (AC1), AT-9283 (AT), Alvocidib (ALV), BRD-K54343811 (BRD), Broad-Sai (BRO), ChEMBL2136735 (CHE), COT-10B (COT), Genistein (GEN), GSK-1059615 (GSK), GSK3 Inhibitor-IX (GIX), Idebenone (IDB), Idelalisib (IDL), Ivermectin (IVE), Pencillin V (PEN).

**Figure S12. Biological Pathway analysis of disease and candidate repurposable drug signatures from HA1E cell line.** Gene lists for candidate drugs consisting of L1000 genes at LFC +/- 0.85 were searched in Reactome. Pathways were determined by p-value < 0.05, and “Entities Found” ≥ 30. Gene lists for disease signatures consisting of L1000 genes at LFC ≥ 0.5 and ≤ -0.5 were searched in Reactome. Pathways were determined by p-value < 0.05, and “Entities Found” ≥ 6. AC1MJ3VH (AC1), AT-9283 (AT), Alvocidib (ALV), BRD-K54343811 (BRD), Broad-Sai (BRO), ChEMBL2136735 (CHE), COT-10B (COT), Genistein (GEN), GSK-1059615 (GSK), GSK3 Inhibitor-IX (GIX), Idebenone (IDB), Idelalisib (IDL), Ivermectin (IVE), Pencillin V (PEN).

Figure S1

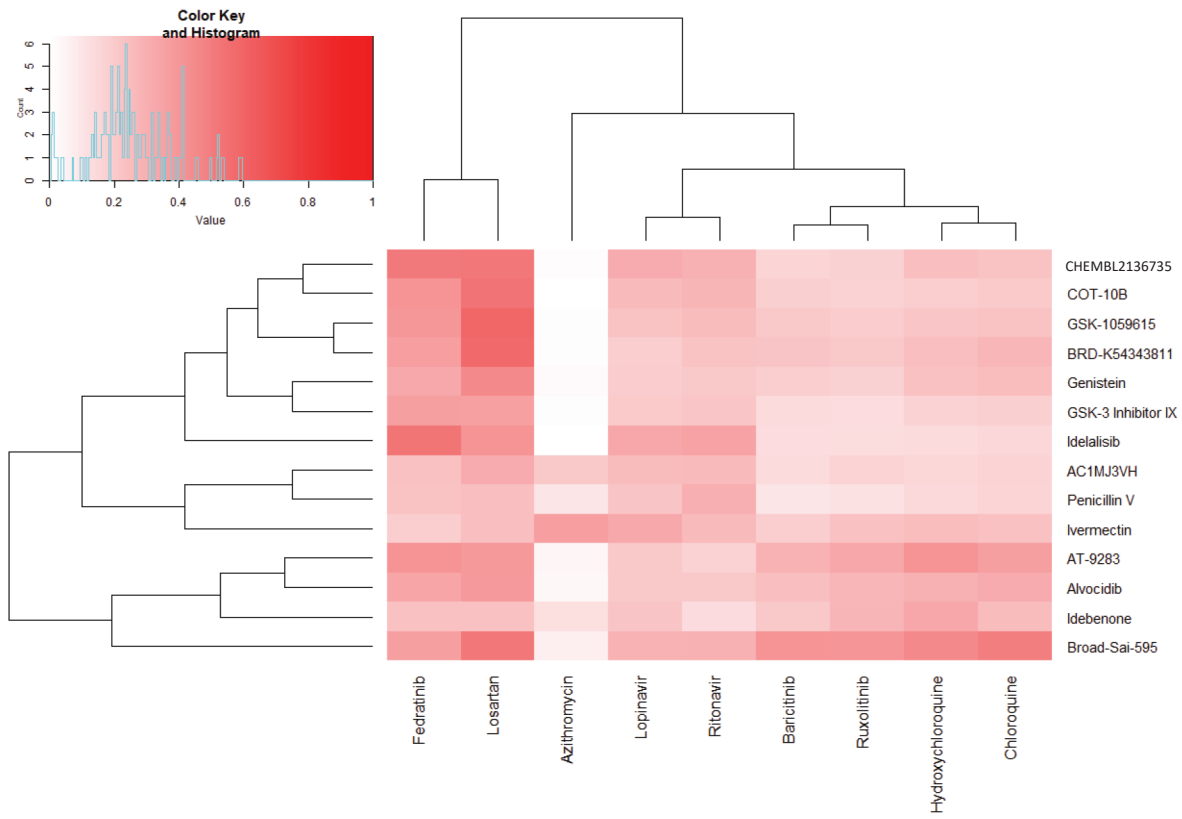



Figure S2

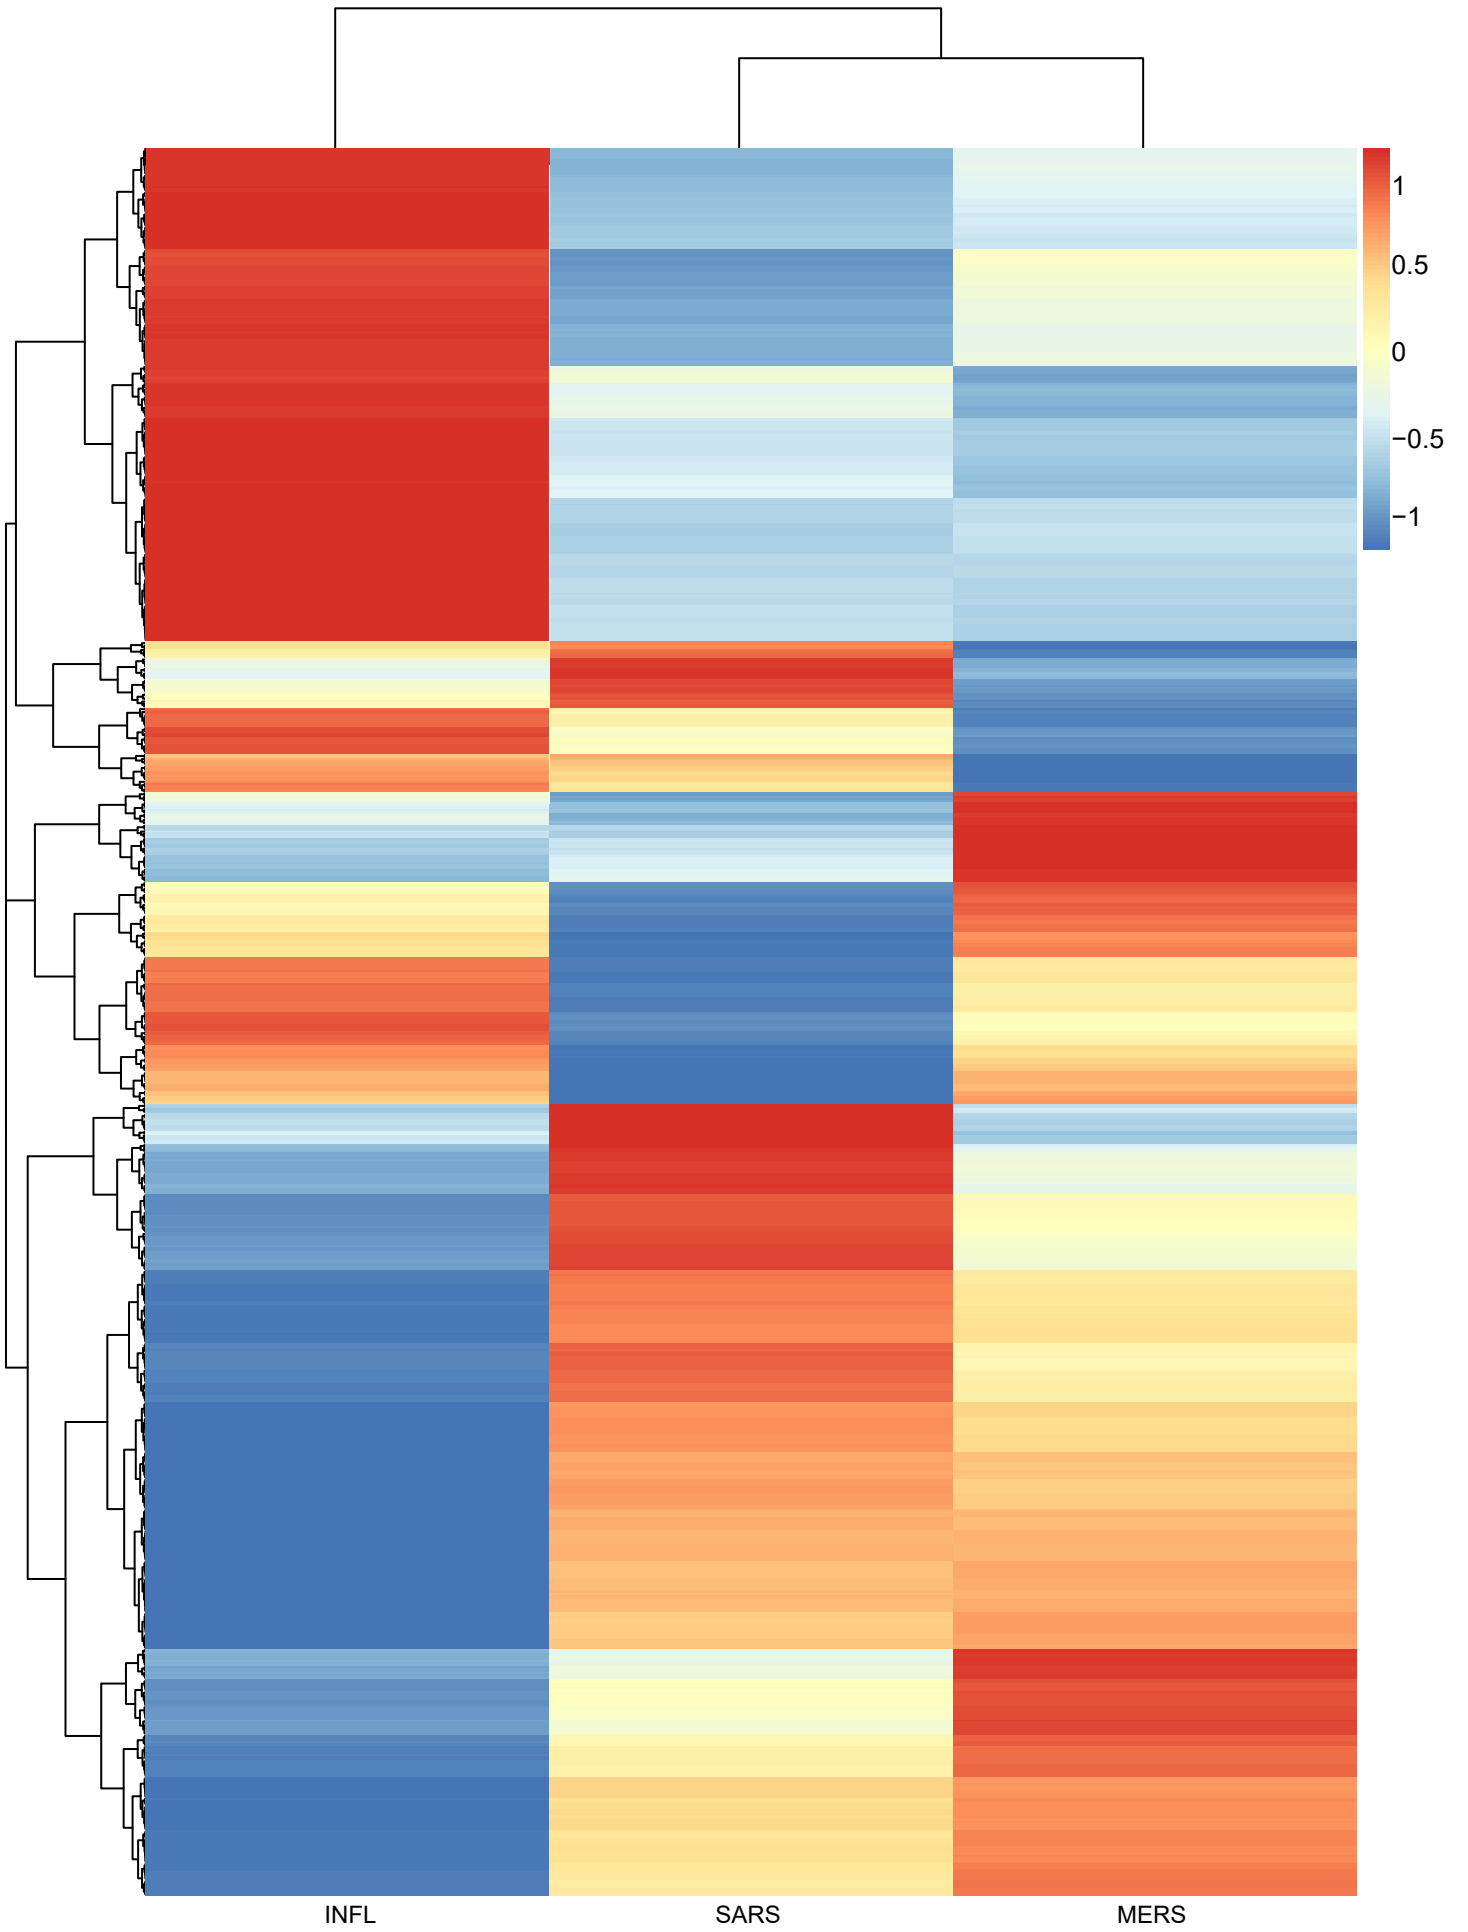

Figure S3

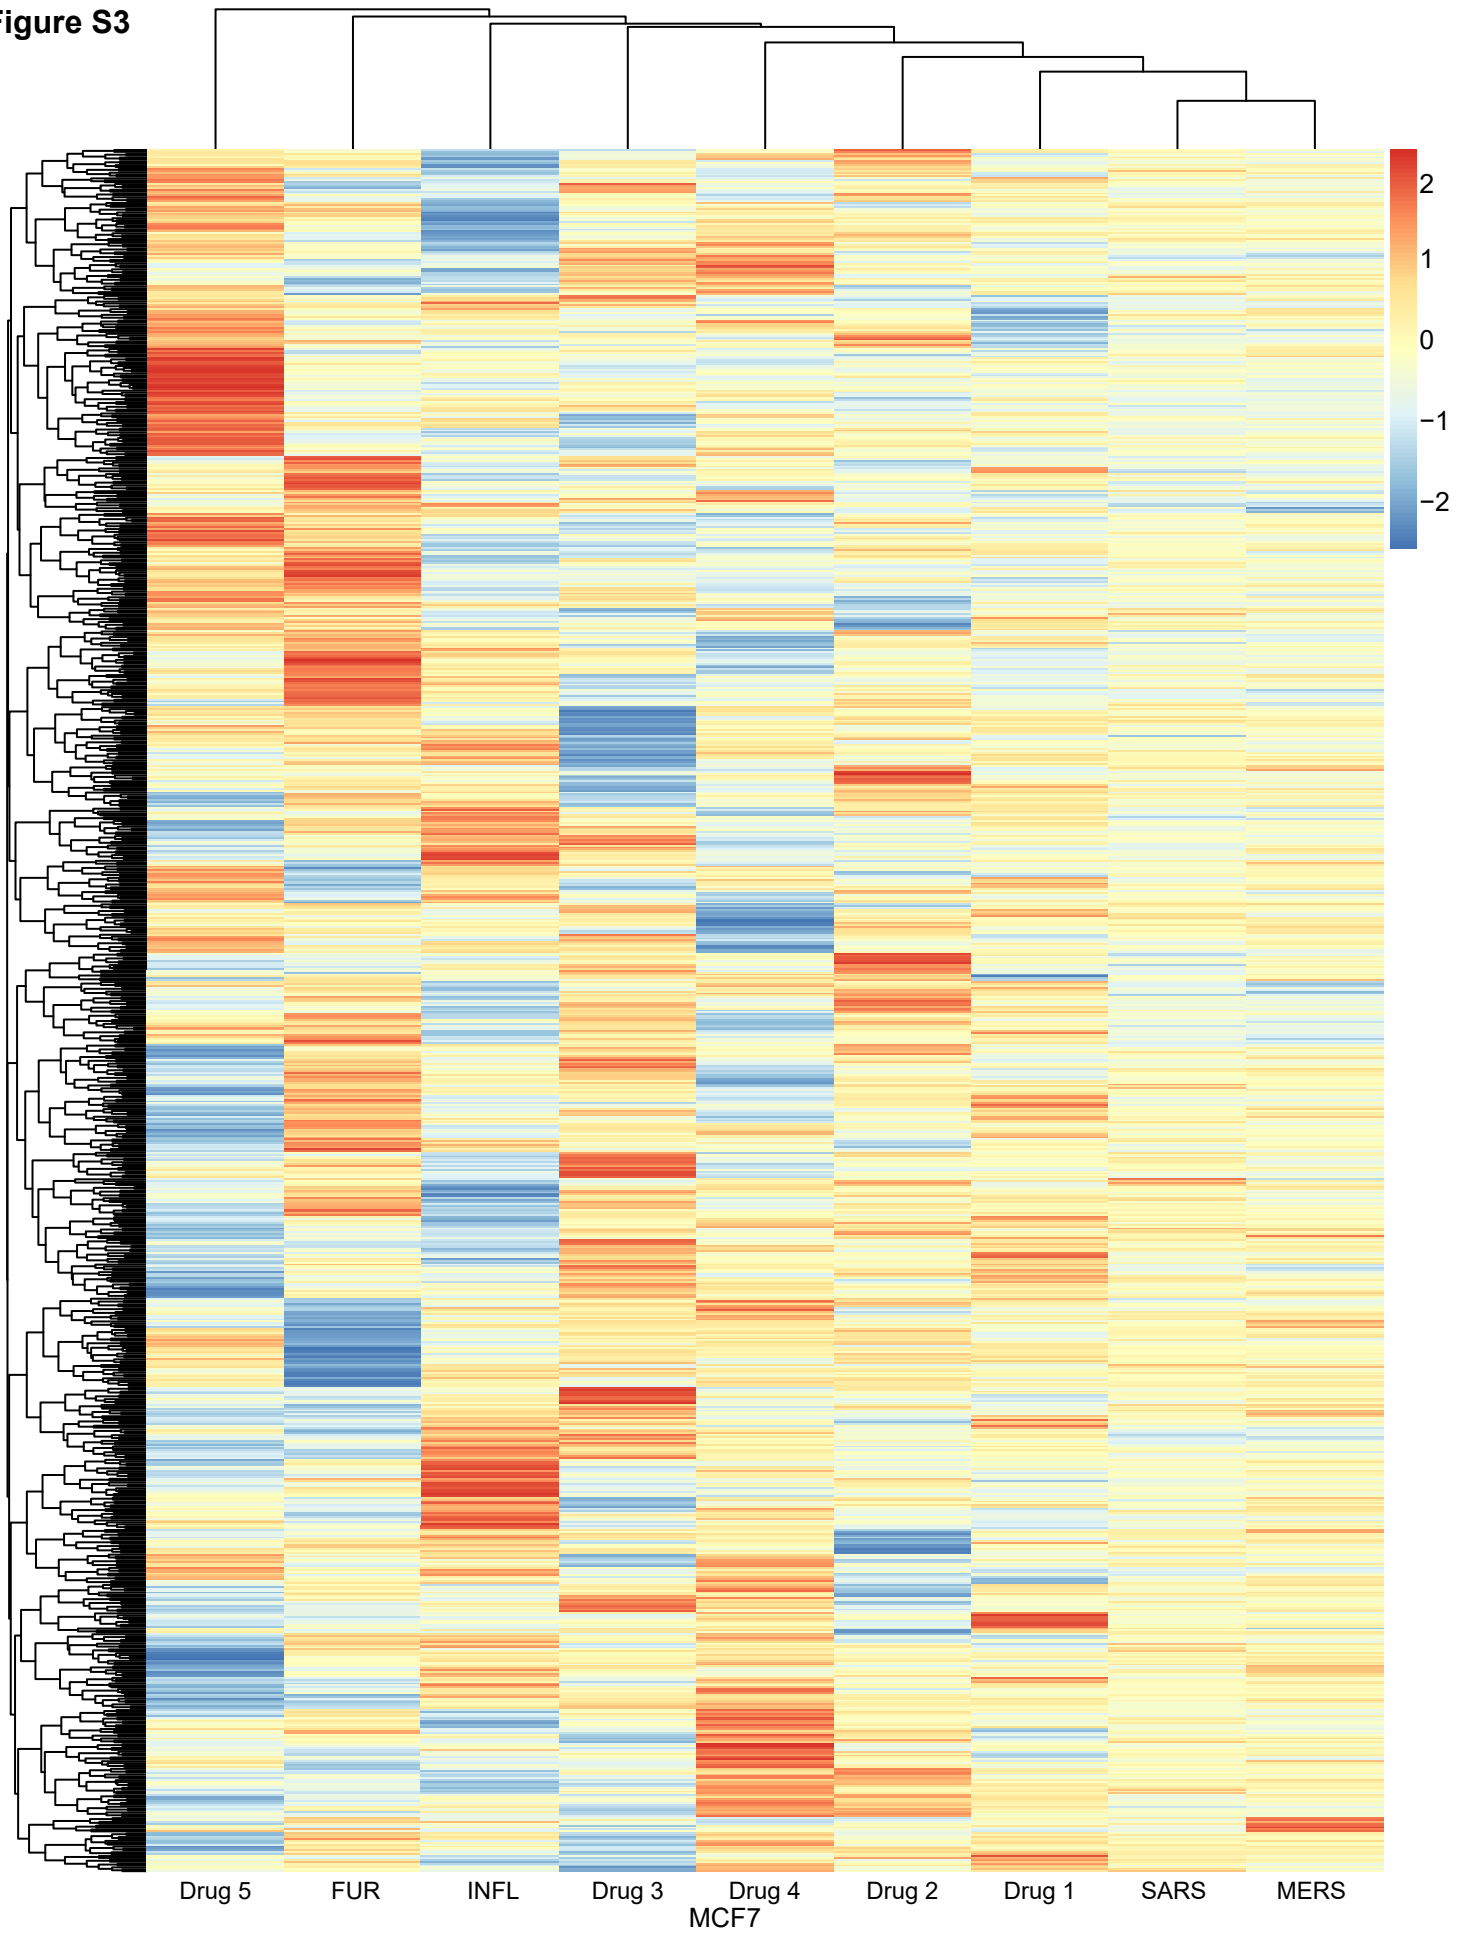

Figure S4

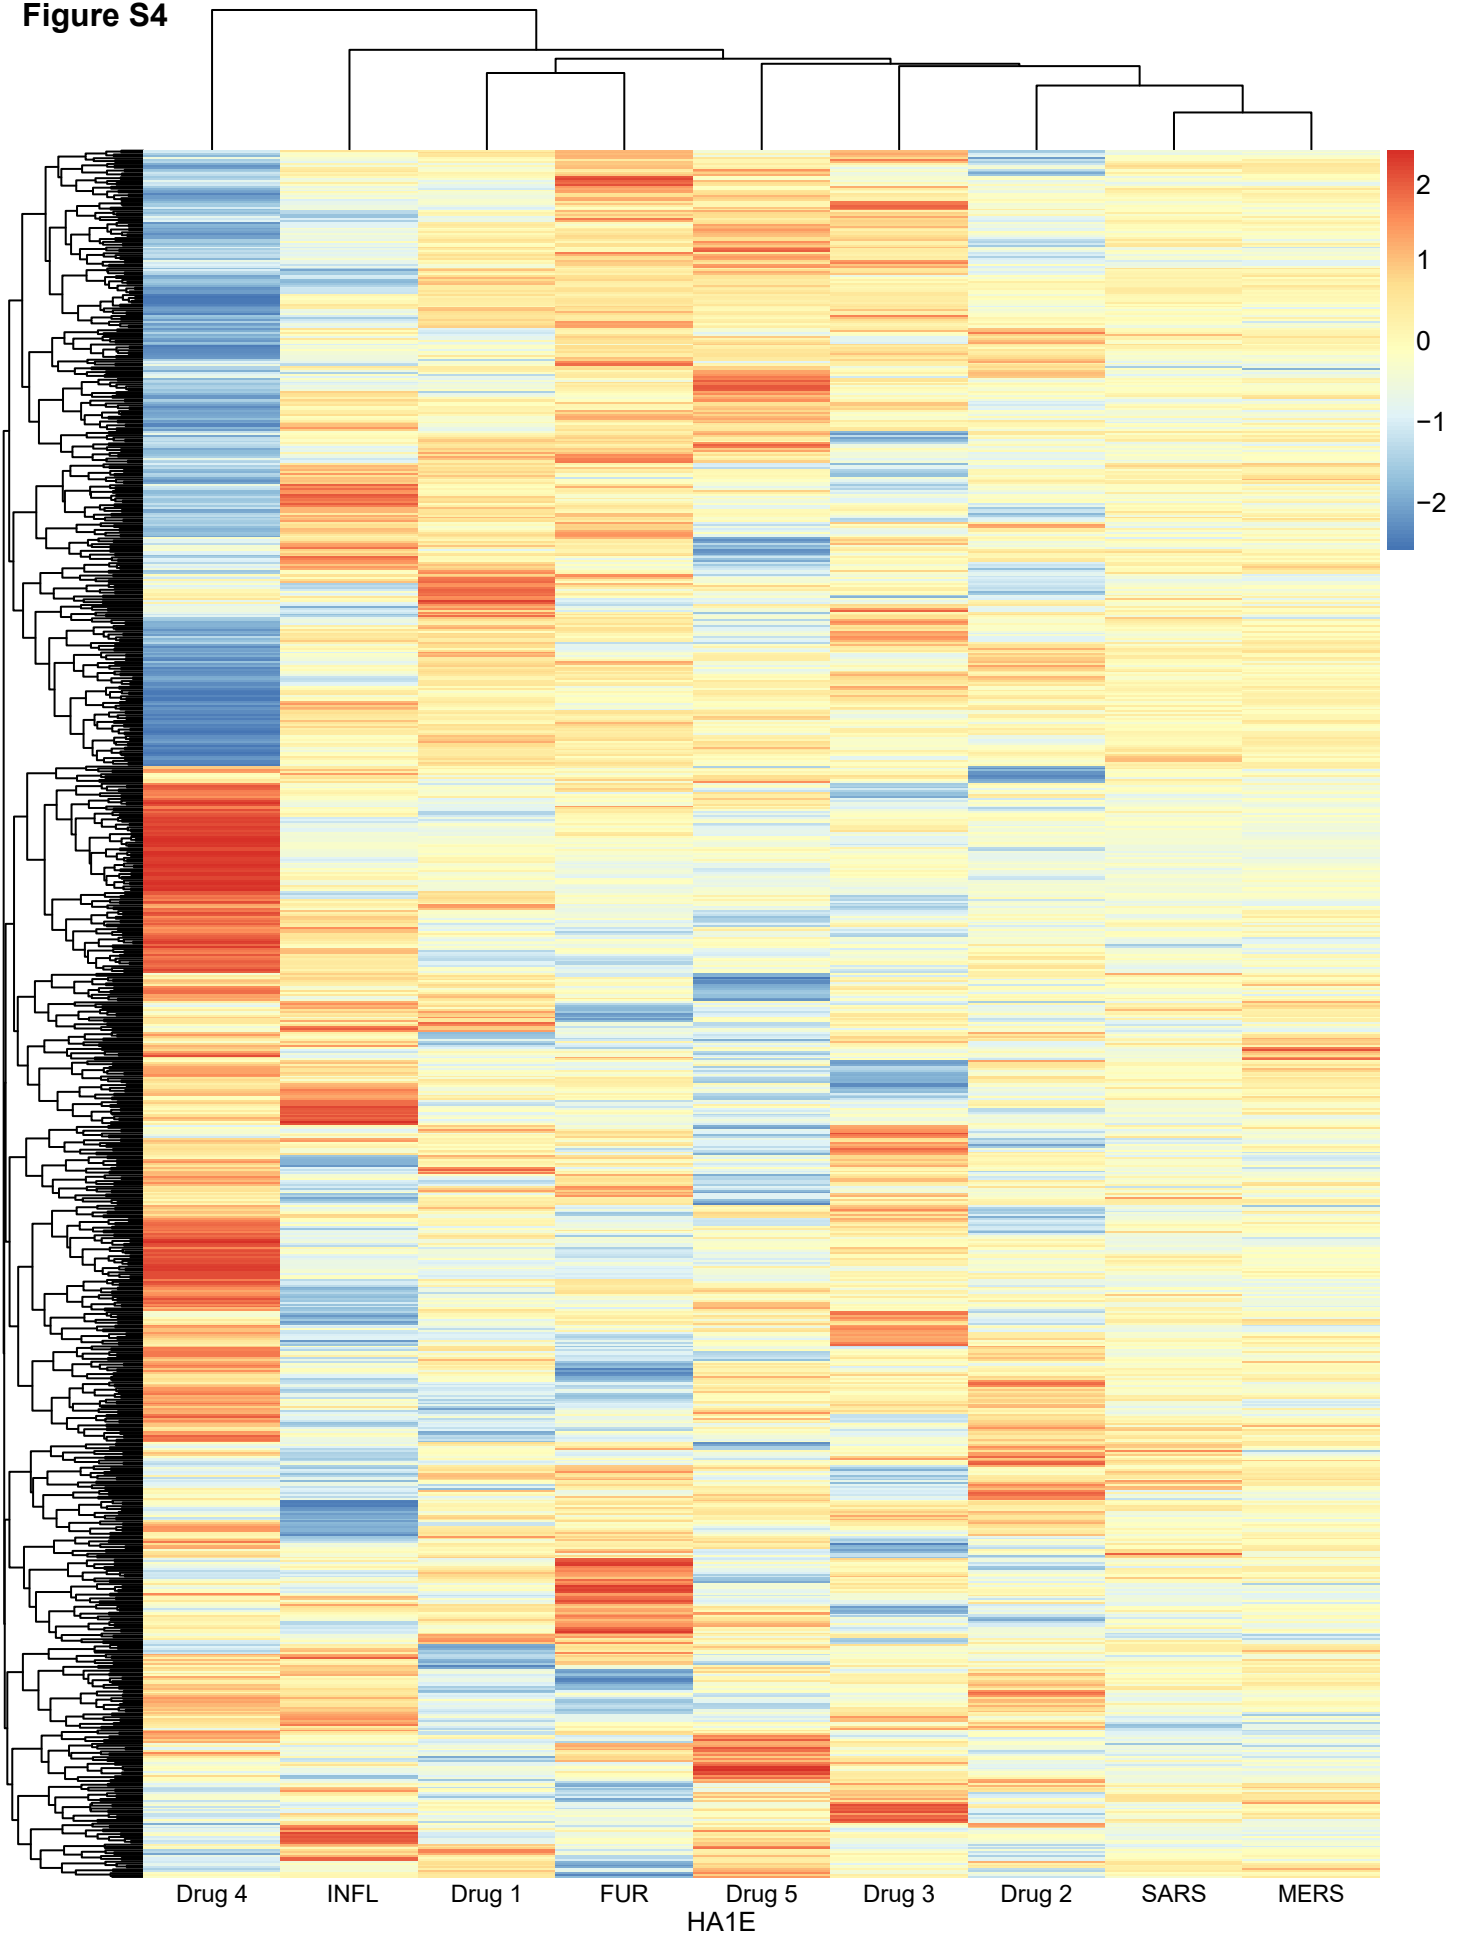

**Figure S5**

| Biological Pathways                    |                                                                                  | Drug Cluster |   |   |   |   | Disease |      |      |
|----------------------------------------|----------------------------------------------------------------------------------|--------------|---|---|---|---|---------|------|------|
|                                        |                                                                                  | 1            | 2 | 3 | 4 | 5 | SARS    | MERS | INFL |
| Cellular responses to external stimuli | Cellular responses to stress                                                     |              |   |   |   |   |         |      |      |
|                                        | Cellular response to heat stress                                                 |              |   |   |   |   |         |      |      |
|                                        | Cellular Senescence                                                              |              |   |   |   |   |         |      |      |
| Cell-Cell Communication                | Cell junction organization                                                       |              |   |   |   |   |         |      |      |
| Cell Cycle                             | Cell Cycle Checkpoints                                                           |              |   |   |   |   |         |      |      |
|                                        | G2/M Checkpoints                                                                 |              |   |   |   |   |         |      |      |
|                                        | Cell Cycle, Mitotic                                                              |              |   |   |   |   |         |      |      |
|                                        | Mitotic G1 phase and G1/S transition                                             |              |   |   |   |   |         |      |      |
|                                        | S Phase                                                                          |              |   |   |   |   |         |      |      |
|                                        | Mitotic G2-G2/M phases                                                           |              |   |   |   |   |         |      |      |
| M Phase                                |                                                                                  |              |   |   |   |   |         |      |      |
| Developmental Biology                  | Nervous system development                                                       |              |   |   |   |   |         |      |      |
| Disease                                | Diseases of signal transduction by growth factor receptors and second messengers |              |   |   |   |   |         |      |      |
|                                        | PI3K/AKT Signaling in Cancer                                                     |              |   |   |   |   |         |      |      |
|                                        |                                                                                  |              |   |   |   |   |         |      |      |
| DNA Repair                             |                                                                                  |              |   |   |   |   |         |      |      |
| Gene expression (Transcription)        | RNA Polymerase II Transcription                                                  |              |   |   |   |   |         |      |      |
|                                        | Generic Transcription Pathway                                                    |              |   |   |   |   |         |      |      |
|                                        | Transcriptional Regulation by TP53                                               |              |   |   |   |   |         |      |      |
| Immune System                          | Cytokine Signaling in Immune system                                              |              |   |   |   |   |         |      |      |
|                                        | Signaling by Interleukins                                                        |              |   |   |   |   |         |      |      |
|                                        | Interleukin-4 and Interleukin-13 signaling                                       |              |   |   |   |   |         |      |      |
|                                        | Interleukin-10 signaling                                                         |              |   |   |   |   |         |      |      |
|                                        | FLT3 Signaling                                                                   |              |   |   |   |   |         |      |      |
|                                        | TNFR2 non-canonical NF-kB pathway                                                |              |   |   |   |   |         |      |      |
| Innate Immune System                   |                                                                                  |              |   |   |   |   |         |      |      |
| TCR signaling                          |                                                                                  |              |   |   |   |   |         |      |      |
| Metabolism                             | Regulation of lipid metabolism by PPARalpha                                      |              |   |   |   |   |         |      |      |
|                                        | Metabolism of steroids                                                           |              |   |   |   |   |         |      |      |
| Metabolism of proteins                 | Post-translational protein modification                                          |              |   |   |   |   |         |      |      |
|                                        | Ubiquitination                                                                   |              |   |   |   |   |         |      |      |
|                                        | SUMOylation                                                                      |              |   |   |   |   |         |      |      |
|                                        | SUMO E3 ligases SUMOylate target proteins                                        |              |   |   |   |   |         |      |      |
| Signal Transduction                    | Signaling by Nuclear Receptors                                                   |              |   |   |   |   |         |      |      |
|                                        | ESR-mediated signaling                                                           |              |   |   |   |   |         |      |      |
|                                        | Signaling by Receptor Tyrosine Kinases                                           |              |   |   |   |   |         |      |      |
|                                        | Signaling by NTRKs                                                               |              |   |   |   |   |         |      |      |
|                                        | Signaling by PDGF                                                                |              |   |   |   |   |         |      |      |
|                                        | Signaling by WNT                                                                 |              |   |   |   |   |         |      |      |
|                                        | TCF dependent signaling in response to WNT                                       |              |   |   |   |   |         |      |      |
|                                        | Signaling by Rho GTPases                                                         |              |   |   |   |   |         |      |      |
|                                        | RHO GTPase Effectors                                                             |              |   |   |   |   |         |      |      |
|                                        | MAPK family signaling cascades                                                   |              |   |   |   |   |         |      |      |
|                                        | MAPK1/MAPK3 signaling                                                            |              |   |   |   |   |         |      |      |
|                                        | Intracellular signaling by second messengers                                     |              |   |   |   |   |         |      |      |
|                                        | PIP3 activates AKT signaling                                                     |              |   |   |   |   |         |      |      |

MCF7 Cell Line

Figure S6

|                                        | Biological Pathways                                                                                                                                                                                                                                                                                                                                                                                                                                                                                                           | Drug Cluster |   |   |   |   | Disease |      |      |
|----------------------------------------|-------------------------------------------------------------------------------------------------------------------------------------------------------------------------------------------------------------------------------------------------------------------------------------------------------------------------------------------------------------------------------------------------------------------------------------------------------------------------------------------------------------------------------|--------------|---|---|---|---|---------|------|------|
|                                        |                                                                                                                                                                                                                                                                                                                                                                                                                                                                                                                               | 1            | 2 | 3 | 4 | 5 | SARS    | MERS | INFL |
| Cellular responses to external stimuli | Cellular responses to stress<br>Cellular response to heat stress<br>Cellular Senescence                                                                                                                                                                                                                                                                                                                                                                                                                                       |              |   |   |   |   |         |      |      |
| Cell-Cell communication                |                                                                                                                                                                                                                                                                                                                                                                                                                                                                                                                               |              |   |   |   |   |         |      |      |
| Cell Cycle                             | Cell Cycle Checkpoints<br>G1/S DNA Damage Checkpoints<br>G2/M Checkpoints<br>Cell Cycle, Mitotic<br>Mitotic G1 phase and G1/S transition<br>S Phase<br>Mitotic G2-G2/M phases<br>M Phase<br>Regulation of mitotic cell cycle                                                                                                                                                                                                                                                                                                  |              |   |   |   |   |         |      |      |
| Chromatin organization                 | Chromatin modifying enzymes                                                                                                                                                                                                                                                                                                                                                                                                                                                                                                   |              |   |   |   |   |         |      |      |
| Developmental Biology                  | Nervous system development<br>Axon guidance                                                                                                                                                                                                                                                                                                                                                                                                                                                                                   |              |   |   |   |   |         |      |      |
| Disease                                | Infectious disease<br>HIV Infection<br>Diseases of signal transduction by growth factor receptors and second messengers<br>PI3K/AKT Signaling in Cancer                                                                                                                                                                                                                                                                                                                                                                       |              |   |   |   |   |         |      |      |
| DNA Repair                             | Base Excision Repair<br>Resolution of Abasic Sites (AP sites)<br>DNA Double-Strand Break Repair<br>Homology Directed Repair<br>Nucleotide Excision Repair<br>Transcription-Coupled Nucleotide Excision Repair (TC-NER)<br>Global Genome Nucleotide Excision Repair (GG-NER)                                                                                                                                                                                                                                                   |              |   |   |   |   |         |      |      |
| DNA Replication                        | Synthesis of DNA<br>DNA strand elongation<br>Switching of origins to a post-replicative state<br>DNA Replication Pre-Initiation                                                                                                                                                                                                                                                                                                                                                                                               |              |   |   |   |   |         |      |      |
| Extracellular matrix organization      | Degradation of the extracellular matrix                                                                                                                                                                                                                                                                                                                                                                                                                                                                                       |              |   |   |   |   |         |      |      |
| Gene expression (Transcription)        | RNA Polymerase II Transcription<br>Generic Transcription Pathway<br>Transcriptional Regulation by TP53<br>Regulation of TP53 Activity<br>Epigenetic regulation of gene expression                                                                                                                                                                                                                                                                                                                                             |              |   |   |   |   |         |      |      |
| Hemostasis                             | Platelet activation, signaling and aggregation                                                                                                                                                                                                                                                                                                                                                                                                                                                                                |              |   |   |   |   |         |      |      |
| Immune System                          | Cytokine Signaling in Immune system<br>Signaling by Interleukins<br>Interleukin-4 and Interleukin-13 signaling<br>Interleukin-10 signaling<br>FLT3 Signaling<br>Interferon Signaling<br>Innate Immune System<br>Neutrophil degranulation<br>Toll-like Receptor Cascades<br>C-type lectin receptors (CLRs)<br>Fc epsilon receptor (FCER1) signaling<br>Adaptive Immune System<br>Signaling by the B Cell Receptor (BCR)                                                                                                        |              |   |   |   |   |         |      |      |
| Metabolism                             | Metabolism of lipids<br>Regulation of lipid metabolism by PPARalpha<br>Metabolism of carbohydrates<br>Glucose metabolism                                                                                                                                                                                                                                                                                                                                                                                                      |              |   |   |   |   |         |      |      |
| Metabolism of proteins                 | Post-translational protein modification<br>Deubiquitination<br>SUMOylation<br>SUMO E3 ligases SUMOylate target proteins<br>Neddylation<br>Unfolded Protein Response (UPR)<br>IRE1alpha activates chaperones                                                                                                                                                                                                                                                                                                                   |              |   |   |   |   |         |      |      |
| Metabolism of RNA                      | Regulation of mRNA stability by proteins that bind AU-rich elements                                                                                                                                                                                                                                                                                                                                                                                                                                                           |              |   |   |   |   |         |      |      |
| Programmed Cell Death                  | Apoptosis<br>Intrinsic Pathway for Apoptosis                                                                                                                                                                                                                                                                                                                                                                                                                                                                                  |              |   |   |   |   |         |      |      |
| Signal Transduction                    | Signaling by Nuclear Receptors<br>ESR-mediated signaling<br>Signaling by Receptor Tyrosine Kinases<br>Signaling by NTRKs<br>Signaling by VEGF<br>MAPK family signaling cascades<br>MAPK1/MAPK3 signaling<br>MAPK6/MAPK4 signaling<br>Intracellular signaling by second messengers<br>PIP3 activates AKT signaling<br>Signaling by NOTCH<br>Signaling by WNT<br>TCF dependent signaling in response to WNT<br>Signaling by Non-Receptor Tyrosine Kinases<br>Signaling by PTK6<br>Signaling by Hedgehog<br>Hedgehog 'off' state |              |   |   |   |   |         |      |      |

HA1E Cell Line

Figure S7

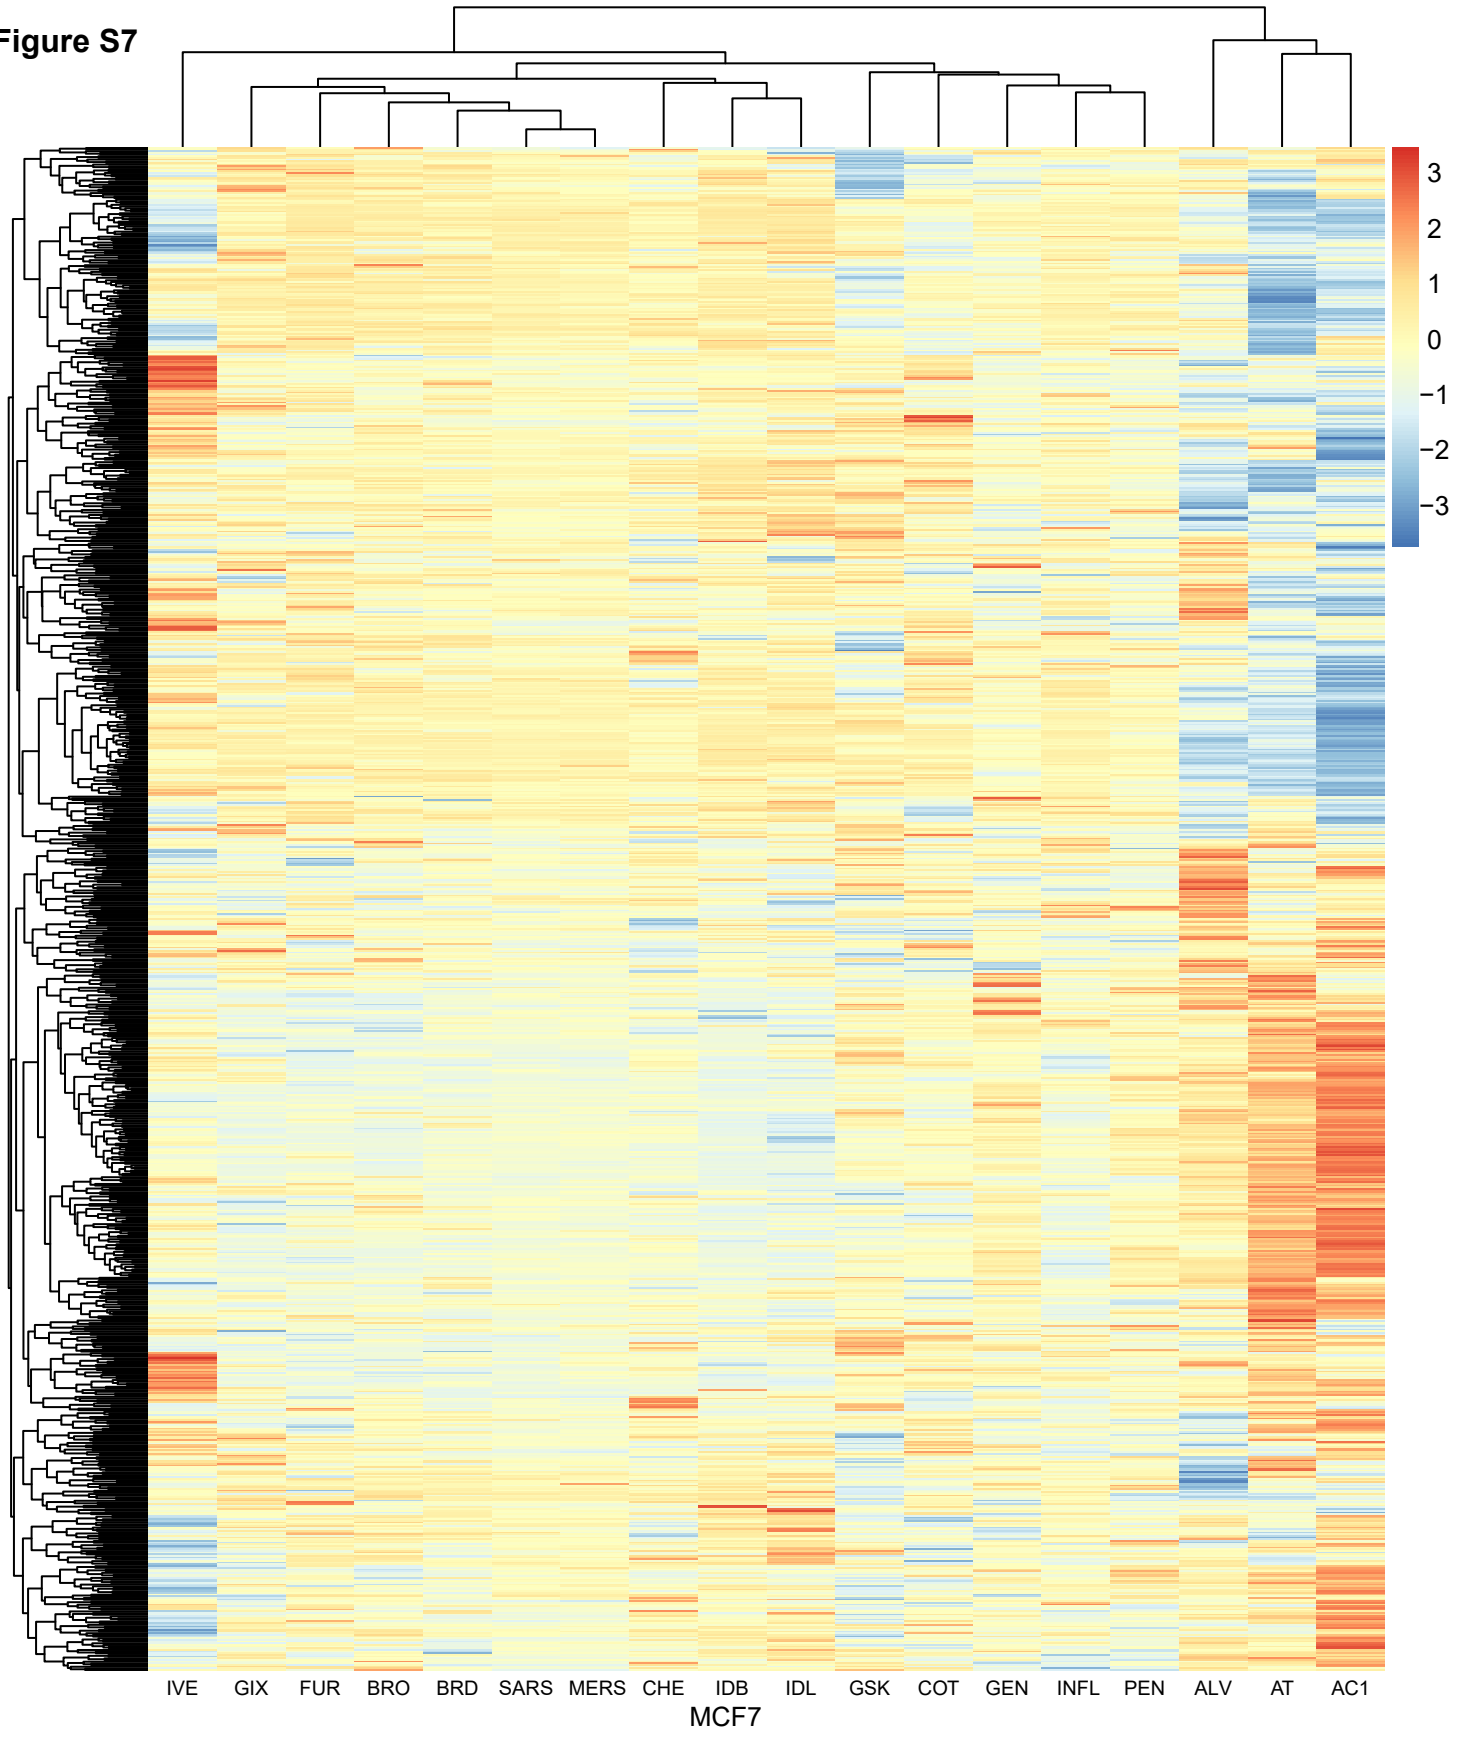

Figure S8

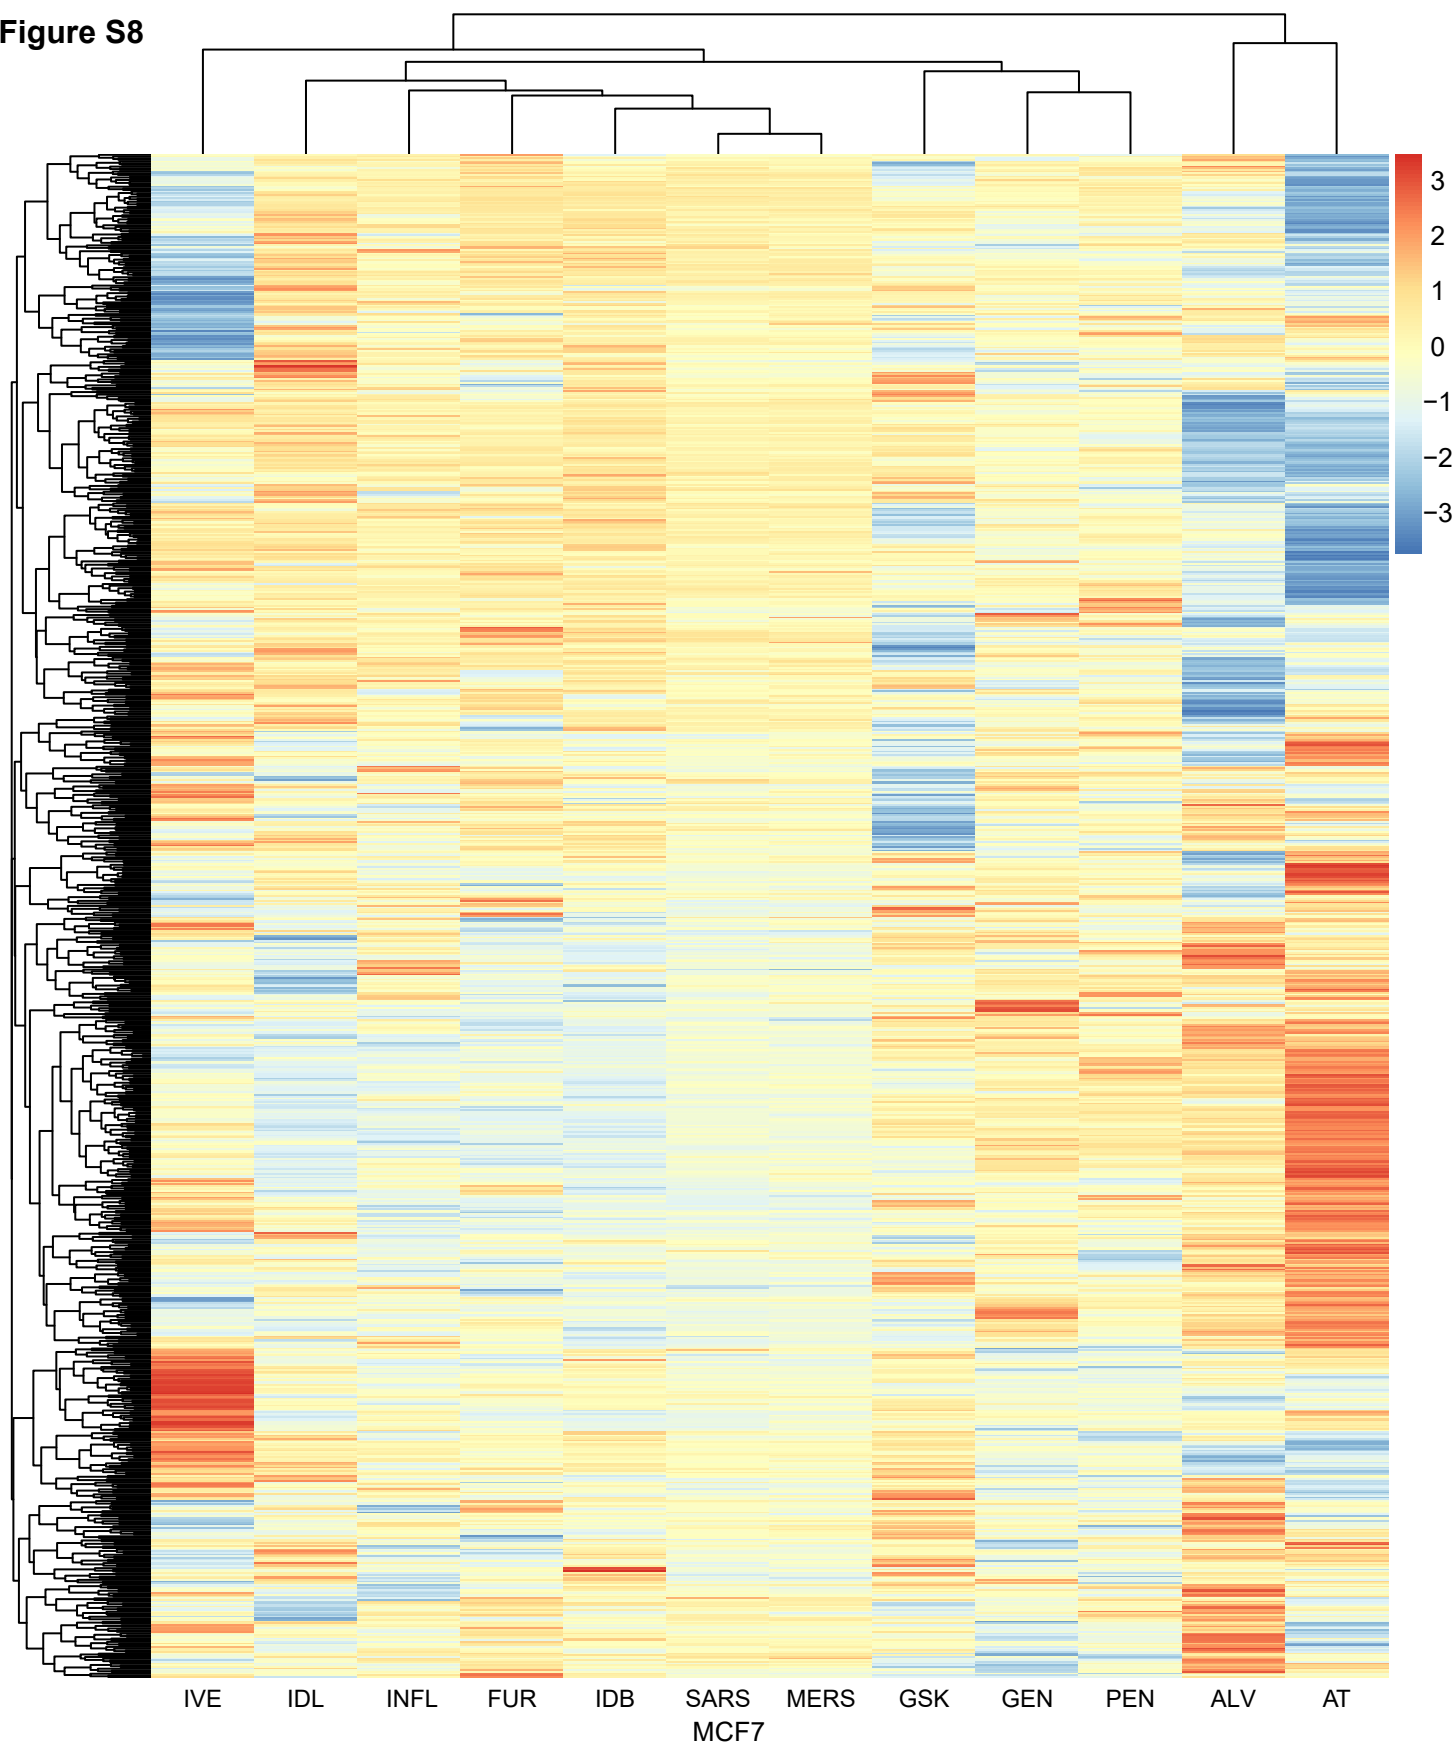

Figure S9

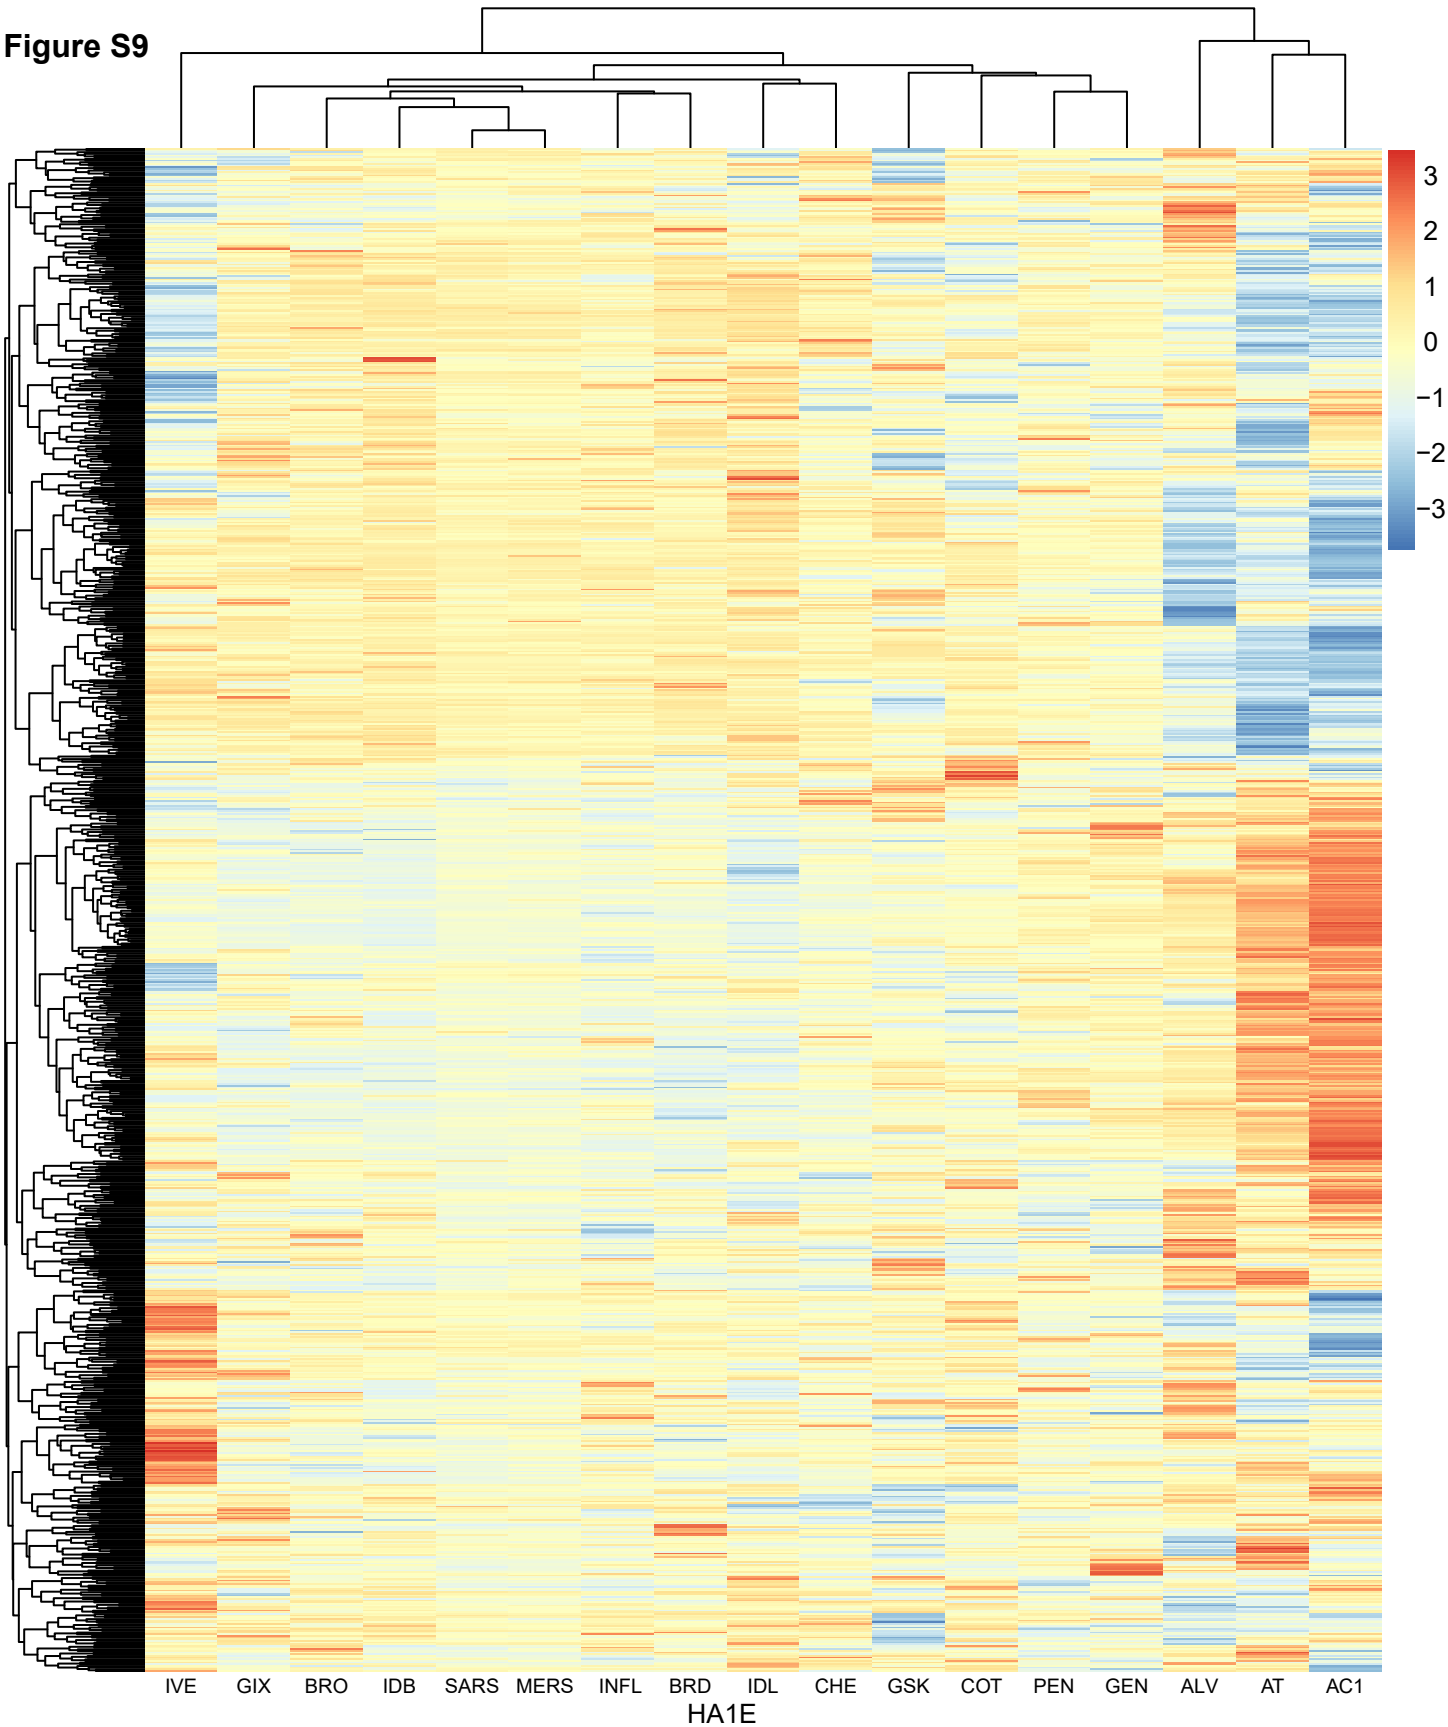



Figure S10

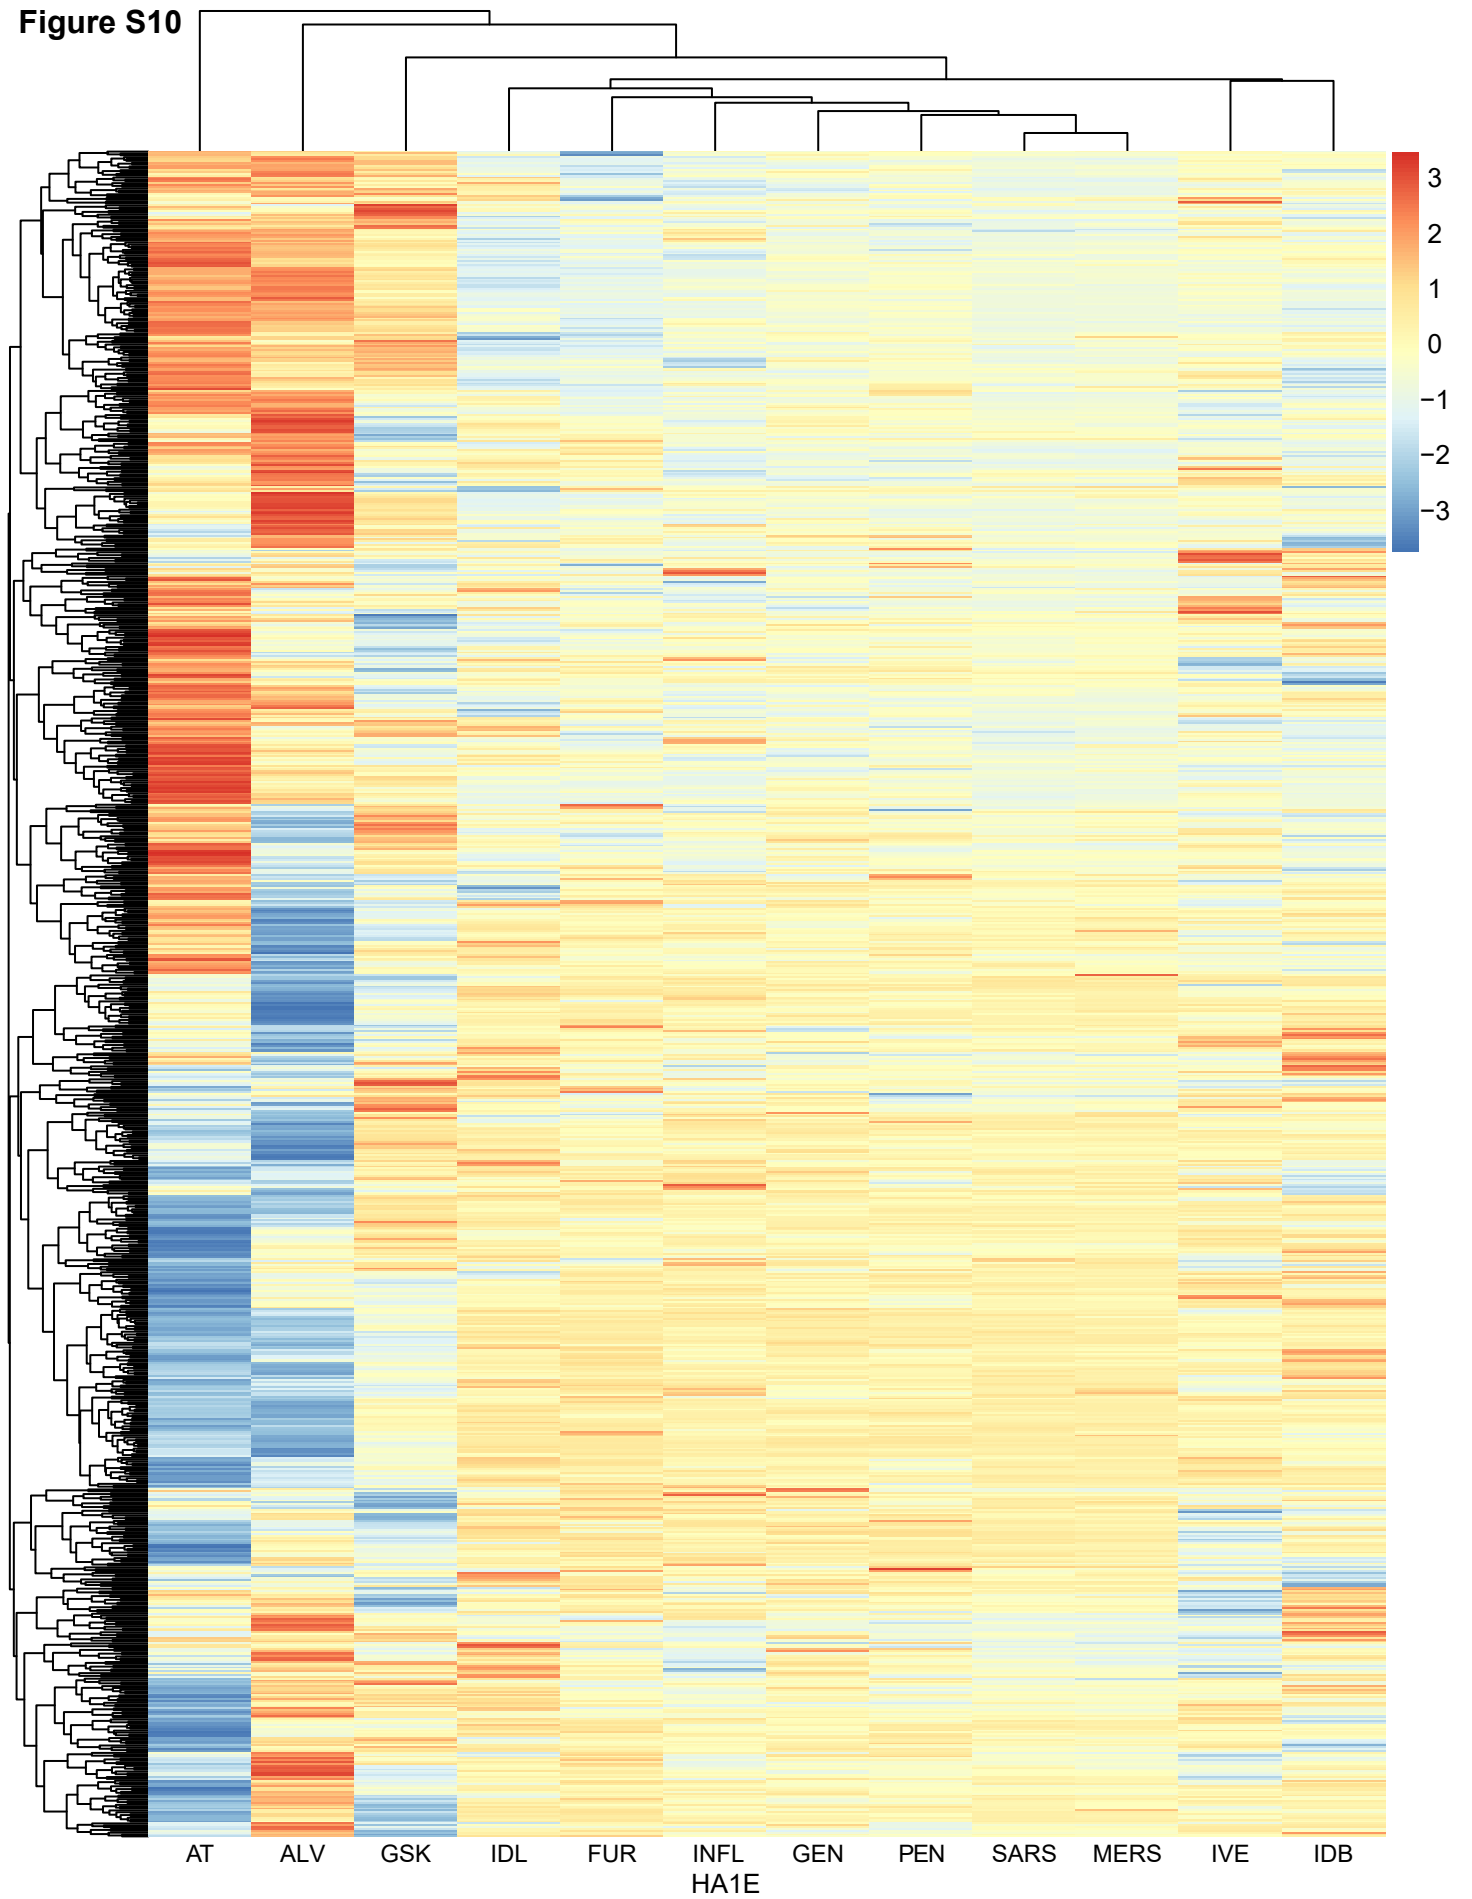

Figure S11

| Biological Pathways                    |                                                                                  | Candidate Drugs |     |    |     |     |     |     |     |     |     |     |     |     | Disease |      |      |  |
|----------------------------------------|----------------------------------------------------------------------------------|-----------------|-----|----|-----|-----|-----|-----|-----|-----|-----|-----|-----|-----|---------|------|------|--|
|                                        |                                                                                  | AC1             | ALV | AT | BRO | CHE | COT | GEN | GIX | GSK | IDB | IDL | IVE | PEN | SARS    | MERS | INFL |  |
| Cellular responses to external stimuli | Cellular responses to stress                                                     |                 |     |    |     |     |     |     |     |     |     |     |     |     |         |      |      |  |
|                                        | Cellular Senescence                                                              |                 |     |    |     |     |     |     |     |     |     |     |     |     |         |      |      |  |
| Cell Cycle                             | Cell Cycle Checkpoints                                                           |                 |     |    |     |     |     |     |     |     |     |     |     |     |         |      |      |  |
|                                        | G2/M Checkpoints                                                                 |                 |     |    |     |     |     |     |     |     |     |     |     |     |         |      |      |  |
|                                        | Cell Cycle, Mitotic                                                              |                 |     |    |     |     |     |     |     |     |     |     |     |     |         |      |      |  |
|                                        | Mitotic G1 phase and G1/S transition                                             |                 |     |    |     |     |     |     |     |     |     |     |     |     |         |      |      |  |
|                                        | S Phase                                                                          |                 |     |    |     |     |     |     |     |     |     |     |     |     |         |      |      |  |
| Developmental Biology                  | Mitotic G2-G2/M phases                                                           |                 |     |    |     |     |     |     |     |     |     |     |     |     |         |      |      |  |
|                                        | M Phase                                                                          |                 |     |    |     |     |     |     |     |     |     |     |     |     |         |      |      |  |
| Disease                                | Nervous system development                                                       |                 |     |    |     |     |     |     |     |     |     |     |     |     |         |      |      |  |
|                                        | Axon guidance                                                                    |                 |     |    |     |     |     |     |     |     |     |     |     |     |         |      |      |  |
| Disease                                | Infectious disease                                                               |                 |     |    |     |     |     |     |     |     |     |     |     |     |         |      |      |  |
|                                        | HIV Infection                                                                    |                 |     |    |     |     |     |     |     |     |     |     |     |     |         |      |      |  |
| Disease                                | Diseases of signal transduction by growth factor receptors and second messengers |                 |     |    |     |     |     |     |     |     |     |     |     |     |         |      |      |  |
|                                        |                                                                                  |                 |     |    |     |     |     |     |     |     |     |     |     |     |         |      |      |  |
| DNA Repair                             |                                                                                  |                 |     |    |     |     |     |     |     |     |     |     |     |     |         |      |      |  |
| Extracellular matrix organization      |                                                                                  |                 |     |    |     |     |     |     |     |     |     |     |     |     |         |      |      |  |
| Gene expression (Transcription)        | RNA Polymerase II Transcription                                                  |                 |     |    |     |     |     |     |     |     |     |     |     |     |         |      |      |  |
|                                        | Generic Transcription Pathway                                                    |                 |     |    |     |     |     |     |     |     |     |     |     |     |         |      |      |  |
|                                        | Transcriptional Regulation by TP53                                               |                 |     |    |     |     |     |     |     |     |     |     |     |     |         |      |      |  |
| Hemostasis                             | Platelet activation, signaling and aggregation                                   |                 |     |    |     |     |     |     |     |     |     |     |     |     |         |      |      |  |
| Immune System                          | Cytokine Signaling in Immune system                                              |                 |     |    |     |     |     |     |     |     |     |     |     |     |         |      |      |  |
|                                        | Signaling by Interleukins                                                        |                 |     |    |     |     |     |     |     |     |     |     |     |     |         |      |      |  |
|                                        | Interleukin-4 and Interleukin-13 signaling                                       |                 |     |    |     |     |     |     |     |     |     |     |     |     |         |      |      |  |
|                                        | Interleukin-10 signaling                                                         |                 |     |    |     |     |     |     |     |     |     |     |     |     |         |      |      |  |
|                                        | FLT3 Signaling                                                                   |                 |     |    |     |     |     |     |     |     |     |     |     |     |         |      |      |  |
| Metabolism of proteins                 | Innate Immune System                                                             |                 |     |    |     |     |     |     |     |     |     |     |     |     |         |      |      |  |
|                                        | Neutrophil degranulation                                                         |                 |     |    |     |     |     |     |     |     |     |     |     |     |         |      |      |  |
| Metabolism of proteins                 | Post-translational protein modification                                          |                 |     |    |     |     |     |     |     |     |     |     |     |     |         |      |      |  |
|                                        | Deubiquitination                                                                 |                 |     |    |     |     |     |     |     |     |     |     |     |     |         |      |      |  |
|                                        | SUMOylation                                                                      |                 |     |    |     |     |     |     |     |     |     |     |     |     |         |      |      |  |
| Metabolism of proteins                 | SUMO E3 ligases SUMOylate target proteins                                        |                 |     |    |     |     |     |     |     |     |     |     |     |     |         |      |      |  |
|                                        |                                                                                  |                 |     |    |     |     |     |     |     |     |     |     |     |     |         |      |      |  |
| Metabolism of RNA                      |                                                                                  |                 |     |    |     |     |     |     |     |     |     |     |     |     |         |      |      |  |
| Programmed Cell Death                  | Apoptosis                                                                        |                 |     |    |     |     |     |     |     |     |     |     |     |     |         |      |      |  |
| Signal Transduction                    | Signaling by Nuclear Receptors                                                   |                 |     |    |     |     |     |     |     |     |     |     |     |     |         |      |      |  |
|                                        | ESR-mediated signaling                                                           |                 |     |    |     |     |     |     |     |     |     |     |     |     |         |      |      |  |
|                                        | Signaling by Receptor Tyrosine Kinases                                           |                 |     |    |     |     |     |     |     |     |     |     |     |     |         |      |      |  |
|                                        | Signaling by NTRKs                                                               |                 |     |    |     |     |     |     |     |     |     |     |     |     |         |      |      |  |
|                                        | MAPK family signaling cascades                                                   |                 |     |    |     |     |     |     |     |     |     |     |     |     |         |      |      |  |
|                                        | MAPK1/MAPK3 signaling                                                            |                 |     |    |     |     |     |     |     |     |     |     |     |     |         |      |      |  |
|                                        | Intracellular signaling by second messengers                                     |                 |     |    |     |     |     |     |     |     |     |     |     |     |         |      |      |  |
|                                        | PIP3 activates AKT signaling                                                     |                 |     |    |     |     |     |     |     |     |     |     |     |     |         |      |      |  |
|                                        | Signaling by NOTCH                                                               |                 |     |    |     |     |     |     |     |     |     |     |     |     |         |      |      |  |
|                                        | Signaling by WNT                                                                 |                 |     |    |     |     |     |     |     |     |     |     |     |     |         |      |      |  |
|                                        | TCF dependent signaling in response to WNT                                       |                 |     |    |     |     |     |     |     |     |     |     |     |     |         |      |      |  |
|                                        | Signaling by Rho GTPases                                                         |                 |     |    |     |     |     |     |     |     |     |     |     |     |         |      |      |  |
| RHO GTPase Effectors                   |                                                                                  |                 |     |    |     |     |     |     |     |     |     |     |     |     |         |      |      |  |

MCF7 Cell Line

**Figure S12**

| Biological Pathways                    |                                                                                                                                                                                                                                                                                                                                                                   | Candidate Drugs |     |    |     |     |     |     |     |     |     |     |     |     | Disease |      |      |
|----------------------------------------|-------------------------------------------------------------------------------------------------------------------------------------------------------------------------------------------------------------------------------------------------------------------------------------------------------------------------------------------------------------------|-----------------|-----|----|-----|-----|-----|-----|-----|-----|-----|-----|-----|-----|---------|------|------|
|                                        |                                                                                                                                                                                                                                                                                                                                                                   | ACL             | ALV | AT | BRO | CHE | COT | GEN | GIX | GSK | IDB | IDL | IVE | PEN | SARS    | MERS | INFL |
| Cellular responses to external stimuli | Cellular responses to stress<br>Cellular Senescence                                                                                                                                                                                                                                                                                                               |                 |     |    |     |     |     |     |     |     |     |     |     |     |         |      |      |
| Cell Cycle                             | Cell Cycle Checkpoints<br>G2/M Checkpoints<br>Cell Cycle, Mitotic<br>Mitotic G1 phase and G1/S transition<br>S Phase<br>Mitotic G2-G2/M phases<br>M Phase                                                                                                                                                                                                         |                 |     |    |     |     |     |     |     |     |     |     |     |     |         |      |      |
| Chromatin organization                 | Chromatin modifying enzymes                                                                                                                                                                                                                                                                                                                                       |                 |     |    |     |     |     |     |     |     |     |     |     |     |         |      |      |
| Developmental Biology                  | Nervous system development<br>Axon guidance                                                                                                                                                                                                                                                                                                                       |                 |     |    |     |     |     |     |     |     |     |     |     |     |         |      |      |
| Disease                                | HIV Infection<br>Diseases of signal transduction by growth factor receptors and second messengers                                                                                                                                                                                                                                                                 |                 |     |    |     |     |     |     |     |     |     |     |     |     |         |      |      |
| DNA Repair                             |                                                                                                                                                                                                                                                                                                                                                                   |                 |     |    |     |     |     |     |     |     |     |     |     |     |         |      |      |
| Gene expression (Transcription)        | RNA Polymerase II Transcription<br>Generic Transcription Pathway<br>Transcriptional Regulation by TP53                                                                                                                                                                                                                                                            |                 |     |    |     |     |     |     |     |     |     |     |     |     |         |      |      |
| Hemostasis                             | Platelet activation, signaling and aggregation                                                                                                                                                                                                                                                                                                                    |                 |     |    |     |     |     |     |     |     |     |     |     |     |         |      |      |
| Immune System                          | Cytokine Signaling in Immune system<br>Signaling by Interleukins<br>Interleukin-4 and Interleukin-13 signaling<br>Interleukin-10 signaling<br>FLT3 Signaling<br>Innate Immune System<br>Neutrophil degranulation                                                                                                                                                  |                 |     |    |     |     |     |     |     |     |     |     |     |     |         |      |      |
| Metabolism of proteins                 | Post-translational protein modification<br>Ubiquitination<br>SUMOylation<br>SUMO E3 ligases SUMOylate target proteins                                                                                                                                                                                                                                             |                 |     |    |     |     |     |     |     |     |     |     |     |     |         |      |      |
| Programmed Cell Death                  | Apoptosis                                                                                                                                                                                                                                                                                                                                                         |                 |     |    |     |     |     |     |     |     |     |     |     |     |         |      |      |
| Signal Transduction                    | Signaling by Nuclear Receptors<br>ESR-mediated signaling<br>Signaling by Receptor Tyrosine Kinases<br>Signaling by NTRKs<br>MAPK family signaling cascades<br>MAPK1/MAPK3 signaling<br>Intracellular signaling by second messengers<br>PIP3 activates AKT signaling<br>Signaling by NOTCH<br>Signaling by WNT<br>Signaling by Rho GTPases<br>RHO GTPase Effectors |                 |     |    |     |     |     |     |     |     |     |     |     |     |         |      |      |

HA1E Cell Line

**Table S1.** Selected drugs with transcriptional profiles in the Library for Integrated Network-Based Cellular Signatures database which were used for input.

| Drug                                        | Trade Names                              | Clinical Indication        | Target                                                                                                           | Canonical Mechanism of Action and Clusters | Anatomical Chemical Therapeutic Classification      | Literature Citing Relevance to SARS-CoV-2 and/or Coronaviridae | Putative Effect on SARS-CoV-2                                                                                                                           |
|---------------------------------------------|------------------------------------------|----------------------------|------------------------------------------------------------------------------------------------------------------|--------------------------------------------|-----------------------------------------------------|----------------------------------------------------------------|---------------------------------------------------------------------------------------------------------------------------------------------------------|
| <b>Drugs with iLINCS signature present.</b> |                                          |                            |                                                                                                                  |                                            |                                                     |                                                                |                                                                                                                                                         |
| Hydroxychloroquine [1]                      | Plaquenil                                | Malaria; Immunosuppressant | Toll-like receptor 9; Toll-like receptor 7                                                                       | Toll-like receptor antagonist              | Antiparasitic products, insecticides and repellents | [2-4]                                                          | Alkalization of phagolysosome; modification of post-translation protein modifications [5, 6]                                                            |
| Chloroquine [7]                             | Aralen                                   | Malaria; Amebiasis         | Toll-like receptor 9<br>Glutathione S-transferase (A2);<br>High mobility group protein B1; tumor necrosis factor |                                            |                                                     |                                                                |                                                                                                                                                         |
| Lopinavir [8]                               | Kaletra / Aluvia (with Ritonavir)        | HIV/AIDS Antiviral Therapy | Human immunodeficiency virus type 1 protease                                                                     | Protease inhibitor                         | Antiinfectives for systemic use                     | [9-12]                                                         | Inhibition of CoV-polyprotein processing [9, 13]                                                                                                        |
| Ritonavir [14]                              | Norvir; Kaletra /Aluvia (with Lopinavir) |                            |                                                                                                                  |                                            |                                                     |                                                                |                                                                                                                                                         |
| Fedratinib [15]                             | Inrebic                                  | Antineoplastic             | Tyrosine-protein kinase JAK2; Receptor-type tyrosine-protein kinase FLT3                                         | JAK Inhibitor                              | Antineoplastic and immunomodulating agents          | [16]                                                           | Inhibition of clathrin-mediated viral endocytosis; mediation of inflammatory response, attenuation of cytokine storms from prolonged infection [16, 17] |
| Ruxolitinib [18]                            | Jakafi, Jakavi                           | Antineoplastic             | Tyrosine-protein kinase JAK1 and JAK2                                                                            |                                            |                                                     |                                                                |                                                                                                                                                         |
| Baricitinib [19]                            | Olumiant, Baricinix                      | Immunosuppressant          | Tyrosine-protein kinase JAK1, JAK2, and JAK3; Protein-tyrosine kinase 2-beta                                     |                                            |                                                     |                                                                |                                                                                                                                                         |
| Azithromycin [20]                           | Act Azithromycin, AzaSITE,               | Bacterial infections       | 23S Ribosomal RNA; Protein-arginine deaminase type-4                                                             | Inhibition of bacterial protein synthesis  | Antiinfectives for systemic use                     | [4]                                                            | Adjunct therapy with hydroxychloroquine.                                                                                                                |

|                                                 |                        |                                             |                                                                                                                        |                                                                                                                   |                                            |          |                                                                                                                        |
|-------------------------------------------------|------------------------|---------------------------------------------|------------------------------------------------------------------------------------------------------------------------|-------------------------------------------------------------------------------------------------------------------|--------------------------------------------|----------|------------------------------------------------------------------------------------------------------------------------|
|                                                 | Zithromax, Zmax        |                                             |                                                                                                                        |                                                                                                                   |                                            |          |                                                                                                                        |
| Losartan [21]                                   | Act Losartan, Cozaar   | Hypertension                                | Type-1 angiotensin II (AGII) receptor                                                                                  | AGII receptor antagonist                                                                                          | Cardiovascular system                      | [22]     | Angiotensin receptor blocker.                                                                                          |
| <b>Drugs with iLINCS signature not present.</b> |                        |                                             |                                                                                                                        |                                                                                                                   |                                            |          |                                                                                                                        |
| Remdesivir [23]                                 | Remdesivir             | Ebola                                       | Replicase polyprotein 1ab; RNA-directed RNA polymerase L                                                               | Nucleoside analog, inhibition of viral RNA polymerase                                                             | No record                                  | [24-27]  | Inhibition of RNA dependent RNA polymerase [27]                                                                        |
| Rocaglate                                       | Not found in DrugBank. |                                             |                                                                                                                        |                                                                                                                   | No record                                  | [28]     | Inhibition of viral translation [28].                                                                                  |
| Silvesterol                                     | Not found in DrugBank. |                                             |                                                                                                                        |                                                                                                                   | No record                                  | [28, 29] | Inhibition of viral translation [28].                                                                                  |
| Umifenovir [30]                                 | Arbidol                | Viral prophylaxis; Broad spectrum antiviral | Cytochrome P450 3A4, 2E1, 1A2, 2D6, 2C9, 3A5; UDP-glucuronosyltransferase 2B7, 1-9; Dimethylaniline monooxygenase 1, 3 | Aromatic rings interfere with viral endocytosis, exocytosis, intracellular trafficking, and destabilize membranes | Antiinfectives for systemic use            | [31-33]  | No specific purported mechanism yet published.                                                                         |
| N10169                                          | Not found in DrugBank. |                                             |                                                                                                                        |                                                                                                                   | No record                                  | [34]     | Inhibition of pyrimidine biosynthesis [34].                                                                            |
| Interferon Alphacon-1 [35]                      | Infergen               | Antineoplastic                              | Interferon alpha/beta receptor 1, 2                                                                                    | Interferon receptor agonist, JAK activator                                                                        | Antineoplastic and immunomodulating agents | [36, 37] | Upregulation of MHC 1 to present viral antigens.                                                                       |
| <i>Polygonaceae spp.; Rheum palmatum L.</i>     | Not found in DrugBank. |                                             |                                                                                                                        |                                                                                                                   | No record                                  | [38, 39] | Inhibition of viral cell-entry by preventing interaction of CoV Spike Protein from interacting with ACE2 receptor [39] |
| Camostat mesylate [40]                          | N/A                    | Pancreatitis, Japan [41, 42]                | N/A                                                                                                                    | Serine protease inhibitor TMPRSS2                                                                                 | Blood and blood forming organs             | [43-45]  | Inhibition of viral cell-entry [43]                                                                                    |

Information relating to these drugs (trade name, clinical indication, targets, and canonical mechanism of action) were referenced from DrugBank (<https://www.drugbank.ca/>). Anatomical Therapeutic Chemical (ATC) classification was referenced from ([https://www.whooc.no/atc\\_ddd\\_index/](https://www.whooc.no/atc_ddd_index/)). For simplicity, the first-level of ATC classification is indicated.

**Table S2.** Gene threshold cutoff of generating disease signatures.

| Disease | Cell Line | Perturbagens Identified at LFC threshold |      |      |
|---------|-----------|------------------------------------------|------|------|
|         |           | All L1000                                | 0.26 | 0.5  |
| INFL    | HA1E      | 1                                        | 0    | 0    |
|         | MCF7      | 0                                        | 0    | 0    |
| MERS    | HA1E      | 2                                        | 28   | 320  |
|         | MCF7      | 14                                       | 142  | 1305 |
| SARS    | HA1E      | 20                                       | 172  | 1352 |
|         | MCF7      | 21                                       | 706  | 2181 |

L1000 genes with expression change at log fold change (LFC) threshold 0.5 were selected to generate severe acute respiratory syndrome (SARS), Middle East respiratory syndrome (MERS), and influenza (INFL) gene signatures. At this threshold, following connectivity analysis, a large number of chemical perturbagen signatures were identified as discordant to the SARS signature (discordance  $\leq -0.321$ ) in both MCF7 and HA1E cell lines. At the same threshold, no chemical perturbagens were identified as discordant to the INFL signature, and fewer than 50% of the number of perturbagens were identified in MERS compared to SARS.
